1 Title

2 Inbred or Outbred? Genetic diversity in laboratory rodent colonies

3

4 Authors

5 Thomas D. Brekke\*, Katherine A. Steele<sup>†</sup>, John F. Mulley\*

6

7 Affiliations

8 \* School of Biological Sciences, Bangor University, Bangor, Gwynedd, LL57 2DG, United

9 Kingdom

10 <sup>†</sup> School of Environment, Natural Resources and Geography, Bangor University, Bangor,

11 Gwynedd, LL57 2DG, United Kingdom

12

13

14 Data archiving

15 Raw sequence data is archived in the SRA. The BioProject accession number is

16 PRJNA397533 and the sample accessions are SAMN07460176-SAMN07460199. Data is

17 embargoed and will be released upon publication.

18

19

20

21

22

23

24  
25  
26  
27  
28  
29  
30  
31  
32  
33  
34  
35  
36  
37  
38  
39  
40  
41  
42  
43  
44  
45  
46

## ABSTRACT

Non-model rodents are widely used as subjects for both basic and applied biological research, but the genetic diversity of the study individuals is rarely quantified. University-housed colonies tend to be small and subject to founder effects and genetic drift and so may be highly inbred or show substantial genetic divergence from other colonies, even those derived from the same source. Disregard for the levels of genetic diversity in an animal colony may result in a failure to replicate results if a different colony is used to repeat an experiment, as different colonies may have fixed alternative variants. Here we use high throughput sequencing to demonstrate genetic divergence in three isolated colonies of Mongolian gerbil (*Meriones unguiculatus*) even though they were all established recently from the same source. We also show that genetic diversity in allegedly ‘outbred’ colonies of non-model rodents (gerbils, hamsters, house mice, and deer mice) varies considerably from nearly no segregating diversity, to very high levels of polymorphism. We conclude that genetic divergence in isolated colonies may play an important role in the ‘replication crisis’. In a more positive light, divergent rodent colonies represent an opportunity to leverage genetically distinct individuals in genetic crossing experiments. In sum, awareness of the genetic diversity of an animal colony is paramount as it allows researchers to properly replicate experiments and also to capitalize on other, genetically distinct individuals to explore the genetic basis of a trait.

47

## INTRODUCTION

48         The genetic variation present in laboratory rodent colonies has important implications for

49 the design, outcome and reproducibility of biological experiments (Justice & Dhillon, 2016).

50 High levels of genetic variation reduce power and increase variation in the response to a

51 treatment, but the experimental results may be more applicable to natural or human populations.

52 Alternatively, inbred colonies provide more power and require fewer animals per experiment by

53 limiting the noise caused by segregating genetic variation (here we define an inbred strain as the

54 result of  $\geq 20$  generations of brother-sister mating or equivalent (Casellas, 2011; Eppig, 2007)).

55 Indeed, minimizing the number of animals (in accordance with the principle of *reduction* in the

56 3Rs (Russell & Burch, 1959)) is one of the main reasons cited for the use of inbred lines rather

57 than outbred colonies (Chia, Achilli, Festing, & Fisher, 2005; Festing, 1999; Groen &

58 Lagerwerf, 1979). Inbred lines with single genes knocked out have proven tremendously

59 powerful for identifying the phenotypic effect of those genes (Festing, 2010), but phenotypic

60 traits and diseases often have complex genetic bases (e.g.: diabetes (Fuchsberger et al., 2016;

61 Rich, 2016), and epilepsy (Meisler, Kearney, Ottman, & Escayg, 2001)), so inbred models with

62 no genetic variation may preclude a complete understanding of the underlying genetic

63 architecture. Genetic variation is essential for the identification of candidate genes underlying

64 complex phenotypes, and projects such as the collaborative cross have gone to great effort (and

65 expense) to reestablish segregating variation into inbred mouse strains in a controlled manner

66 (Churchill et al., 2004; Collaborative Cross Consortium, 2012; Threadgill & Churchill, 2012).

67 Such projects rely on the fact that while there is no segregating variation within a single inbred

68 line, multiple inbred lines have fixed alternative variants and immense power can be gained by

69 leveraging these fixed alleles in a genetic mapping experiment (Collaborative Cross Consortium,  
70 2012; de Koning & McIntyre, 2017; Svenson, Gatti, Valdar, & Welsh, 2012).

71 Genetic crosses involving multiple inbred lines are hugely powerful for genetic  
72 experiments, but true inbred strains of mammals are rare outside of ‘model’ rodents such as mice  
73 and rats. The use of ‘non-model’ rodents, such as gerbils (*Meriones unguiculatus*, (Stuermer &  
74 Wetzel, 2006), hamsters (*Phodopus sp.*, (Brekke, Henry, & Good, 2016), spiny mice (*Acomys*  
75 *sp.*, (Gawriluk et al., 2016) and deer mice (*Peromyscus sp.*, (Weber, Peterson, & Hoekstra,  
76 2013), is mainly restricted to outbred colonies with standing genetic variation. Unfortunately,  
77 even in outbred strains of house mice genetic diversity is often ill-defined (Chia et al., 2005), and  
78 surprisingly little work has been done to quantify diversity in colonies of non-model rodents.  
79 Indeed, the labeling of a strain of animals as ‘outbred’ (Chia et al., 2005) or ‘wild-derived’  
80 (Harper, 2008) may have little to no bearing on the genetic diversity present. Instead, such labels  
81 only demonstrate that the animals have not *purposely* undergone the  $\geq 20$  generations of brother-  
82 sister mating necessary to purge segregating variation and establish a true inbred line (Casellas,  
83 2011; Eppig, 2007). Furthermore, while it is recognized that large colonies will slow the loss of  
84 genetic variation through drift (Papaioannou & Festing, 1980), and commercial providers of  
85 outbred animals may maintain 50-100 breeding pairs per colony, the size of colonies in academic  
86 institutions is constrained by housing space, finances, and human resources. Furthermore,  
87 bottleneck or founder effects are likely to occur as animals are moved between colonies, or used  
88 to establish a new one. Thus, we should expect the amount of standing genetic variation to differ  
89 even between colonies of the same species and strain.

90 Mongolian gerbils (*Meriones unguiculatus*) are a common non-model rodent that have  
91 been used in biological research for many years and have informed our understanding of diseases

92 such as epilepsy (Buchhalter, 1993; Buckmaster, 2006), stroke (Vincent & Rodrick, 1979), and  
93 diabetes (X. Li et al., 2016) as well as basic biology questions about thermal regulation (Thiessen  
94 & Kittrell, 1980; D. Wang, Wang, & Wang, 2000), desert adaptation (McManus, 1972),  
95 domestication (Stuermer & Wetzel, 2006; Stuermer et al., 2003), reproductive biology (Clark,  
96 Ham, & Galef, 1994), hearing (Abbas & Rivolta, 2015; Chen et al., 2012), and more. Despite the  
97 widespread use of gerbils in scientific research, few widely-accessible transcriptomic and  
98 genomic resources have been developed, and the small numbers of genetic markers available are  
99 severely limited in their ability to reveal levels of genetic diversity in laboratory gerbils. Early  
100 reports using microsatellites (Neumann, Maak, & Stuermer, 2001) and AFLPs (Razzoli, Papa,  
101 Valsecchi, & Nonnis Marzano, 2003) suggested that genetic diversity in laboratory gerbil  
102 colonies is a small fraction of that in the wild, and below that of inbred mouse or rat strains, but  
103 more recent reports, also using microsatellites, suggest that variation is quite high (Du et al.,  
104 2015; 2010). A simple explanation for this contradiction is that different strains of animals were  
105 used in each study. Du et al. (2010 and 2015) surveyed four laboratory colonies from China, all  
106 of which were recently established from wild caught individuals, whilst Neumann et al. (2001)  
107 used animals originating from the Tumblebrook Farm strain. This strain has its origins in 20  
108 pairs of wild-caught animals that were used to establish a colony in the Kitasato Institute in  
109 Japan in 1935. An unknown number of gerbils were subsequently transferred to the Central  
110 Laboratories for Experimental Animals in 1949 (Petrij, van Veen, Mettler, & Brückmann, 2001).  
111 In 1954, eleven pairs of these animals were transferred to Tumblebrook Farm in the USA (of  
112 which five females and four males reproduced (Stuermer et al., 2003)), forming the basis of what  
113 might be thought of as the “domesticated laboratory gerbil” (*Meriones unguiculatus forma*  
114 *domestica*,(Stuermer et al., 2003)). Later the Tumblebrook colony was purchased by Charles

115 River Ltd in 1996 and the strain was then rederived and maintained in Italy (Neumann et al.,  
116 2001; Razzoli et al., 2003). These Tumblebrook animals have been maintained since then as an  
117 outbred colony with  $\geq 100$  breeding pairs (C. Parady, personal communication). The population  
118 history of laboratory gerbils is punctuated by a series of bottleneck events each time the colony  
119 was moved and rederived. There is therefore a discrepancy in how this animal is maintained and  
120 sold by commercial providers (as a highly diverse outbred stock) and the results of previous  
121 genetic analyses (which suggest very low levels of diversity (Neumann et al., 2001; Razzoli et  
122 al., 2003)). If gerbils are inbred, fewer are needed to achieve statistically significant results and  
123 maintain a breeding colony. Given the limitations of small-scale microsatellite and AFLP  
124 experiments, we therefore decided to use a genome-wide approach to quantify the genetic  
125 diversity present in Tumblebrook Farm strain gerbils. Here, we evaluate patterns of standing  
126 genetic variation in animals from three different gerbil colonies to identify differences that may  
127 stem from a history of bottlenecks and isolation. All three colonies originated from the European  
128 colony managed by Charles River Ltd. We also compared these with the recently released whole  
129 genome sequence of an individual from an American stock of the Tumblebrook Farm strain  
130 (genbank accession GCA\_002204375.1). We interpret the levels of genetic variation in gerbils in  
131 comparison with colonies of other species such as house mice (*Mus musculus ssp.*), hamsters  
132 (*Phodopus sp.*), and deer mice (*Peromyscus sp.*). We also discuss the possibility of leveraging  
133 the genetic drift inescapable in small mammal colonies to identify differentiated genetic markers  
134 for use in genetic mapping and association studies.

135

136

137

138

## MATERIALS AND METHODS

### 139 **Animals:**

140 Mongolian gerbils are listed in Annex 1 of EU Directive 2010/63/EU and must therefore be  
141 purposely bred for scientific research. The majority (if not all) gerbils used in the European  
142 Union are derived from the Tumblebrook farm stock and many academic institutions in the UK  
143 and elsewhere maintain their own colonies derived from these animals. We analyzed animals  
144 from three of these colonies, and to avoid confusion we refer to each colony by the name of the  
145 city where it was first established: Edinburgh, Sheffield, and Bangor. The Edinburgh colony was  
146 established by Dr. Judith Allen at the University of Edinburgh circa 2005. In 2014, Dr. Leila  
147 Abbas established a new colony at the University of Sheffield from the Charles River Ltd  
148 Tumblebrook stock and at the same time took over care and housing of 3-4 pairs of animals from  
149 Edinburgh, with both stocks maintained separately. In 2016, we took delivery of 12 new  
150 Tumblebrook animals from Charles River (7♀, 5♂) to establish the Bangor colony. We also  
151 received 5 animals from each of the Edinburgh (3♀, 2♂) and Sheffield (2♀, 3♂) stocks. All  
152 three groups were maintained in isolation in Bangor, except for a single test cross between an  
153 Edinburgh female and a Sheffield male. All animals were housed in accordance with E.U. and  
154 Home Office animal care regulations and experiments were reviewed and approved by the  
155 Bangor University Animal Welfare and Ethical Review Board.

### 156 **Tissue collection, DNA extraction, library preparation, and sequencing:**

157 Liver tissue was collected from the 22 founder animals and 2 F<sub>1</sub> Edinburgh x Sheffield  
158 offspring and snap-frozen immediately in liquid nitrogen after each animal was euthanized as  
159 part of routine colony management. DNA was extracted with the Qiagen DNAeasy Blood &  
160 Tissue kit and treated with RNase according to manufacturer's instructions. Extracted DNA was

161 shipped BGI (Hong Kong) for library preparation and sequencing. Uniquely barcoded 100 base-  
162 pair paired-end genotyping-by-sequencing (GBS) libraries were prepared with the 5 base-pair  
163 cutter ApeKI, pooled, and sequenced on a single lane of Illumina 4000 (Elshire et al., 2011).

#### 164 **Bioinformatics:**

165 BGI filtered the raw data through their SOAPnuke filter, which includes demultiplexing  
166 the reads and removing proprietary barcode sequences, and dropping reads that were >26%  
167 adapter sequence, and/or >40% of the bases below a PHRED quality score of 15. We used the  
168 Stacks (v1.46 Catchen, Amores, Hohenlohe, Cresko, & Postlethwait, 2011; Catchen, Hohenlohe,  
169 Bassham, Amores, & Cresko, 2013) pipeline to identify tags and call SNPs from the first reads,  
170 resulting in an average sequencing effort of 7.8 million reads per individual. This analysis  
171 included the standard Stacks pipeline components: process\_radtags, ustacks, cstacks, sstacks, and  
172 populations. All scripts were run with default flags with the following exceptions. With  
173 process\_radtags we cleaned reads (-c), discarded reads with low quality scores (-q), rescued  
174 radtags (-r), and truncated read length to 92 bases (-t 92) to avoid variation in read length that  
175 would otherwise disrupt the remaining pipeline. Thus, our final markers were all 92 base-pairs  
176 long. We ran the deleveraging algorithm in ustacks (-d) and used 6 individuals (a female and  
177 male from each Bangor, Edinburgh, and Sheffield strains) for cstacks. We generated a reference  
178 fasta from the output of cstacks and to it we aligned the raw reads with bwa mem (H. Li &  
179 Durbin, 2009). From these alignments, we extracted depth of coverage with samtools (H. Li et  
180 al., 2009) in order to annotate autosomal, X-, and Y-linked markers. Coverage was standardized  
181 by the sequencing effort of each individual and multiplied by 1,000,000 before being summed  
182 across males and females. Sex-linkage is apparent by comparing standardized coverage of each  
183 marker in males versus females. We first annotated markers with less than 10x total standardized



184 coverage as ‘unknown’ and removed from the dataset as these have too low coverage to reliably  
185 differentiate X- and Y- linked tags from autosomal tags or call variants. We next identified Y-  
186 linked markers as those with  $<1x$  standardized coverage in females. X-linked markers fulfilled  
187 the inequality:  $\text{Coverage}^{\text{male}} < \frac{3}{4} \text{Coverage}^{\text{female}} - 5$ . The slope of this line was chosen to  
188 discriminate points in the X-linked cluster (slope =  $\frac{1}{2}$ ) from those in the autosomal cluster (slope  
189 = 1). The intercept was chosen in order to remain fairly conservative near the origin; that is  
190 erroring towards labeling a true X-linked tag as an autosome rather than labeling a true  
191 autosomal tag as X-linked. All remaining tags were annotated as autosomal. The populations  
192 script was used to generate diversity metrics and F statistics across the genome for autosomal, X-  
193 , and Y-linked markers. Genotypes were called only for individuals with greater than 10x  
194 coverage (-m 10) and only for SNPs in the first 90 bases. We blacklisted SNPs in the final two  
195 bases because of an unusually high number of SNPs on those bases (for further discussion see  
196 Supplemental Figure 1). Finally, we evaluated genetic similarity and population structure with  
197 the SNPRelate package in R (Zheng, Levine, Shen, & Gogarten, 2012) and the program  
198 Structure (Falush, Stephens, & Pritchard, 2003; 2007; Pritchard, Stephens, & Donnelly, 2000;  
199 Rosenberg et al., 2002). We visualized structure data with the program distruct (Rosenberg,  
200 2003). We calculated pairwise diversity between our reference and the recently released gerbil  
201 whole genome sequence (genbank accession GCA\_002204375.1) by aligning the reference  
202 sequences to the genome with bwa mem, discarding partial-length alignments and counting  
203 mismatches across the first 90 bases of the reference.

204 In order to evaluate the levels of nucleotide diversity in gerbils in a more general sense,  
205 we downloaded RAD sequencing data from deer mice (SRA accession PRJNA186607; Weber et  
206 al., 2013) and were provided RAD sequence data for hamsters (Jeff Good, personal

207 communication). These RAD datasets were analyzed with the Stacks pipeline described above  
208 (omitting the chromosomal annotation steps) in order to be directly comparable with diversity  
209 estimates in gerbils. To provide further context for our estimates of  $\pi$  we also retrieved recently  
210 published diversity metrics from house mice in the collaborative cross (Srivastava et al., 2017).

211 **Data availability:**

212 Raw sequencing data is archived in the SRA under the BioProject accession number  
213 PRJNA397533 and the sample accession numbers SAMN07460176-SAMN07460199. The  
214 reference fasta file (including Autosomal, X-, or Y-linkage of each tag) as well as the VCF file  
215 containing the locations of all SNPs are available as supplemental data.

216

217

218

219

220

221

222

223

224

225

226

227

228

229

230

## RESULTS

231 We compared sequencing coverage in females and males to annotate 718,385 autosomal  
232 markers, 5,148 X-linked markers, and 2,355 Y-linked markers (Figure 1). We identified 30,365  
233 SNPs spread across 24,326 markers (1.25 SNPs/marker). Average autosomal nucleotide diversity  
234 ( $\pi$ ) is 0.0059 (Table 1), which describes the variation in unconstrained, non-coding regions.  
235 Average heterozygosity at autosomal variant sites is 0.447 and is slightly higher on the sex  
236 chromosomes (Table 1).

237 In order to evaluate how different the gerbil genome (GCA\_002204375.1) is from our  
238 colonies, we counted the number of differences between our GBS reference and the genome.  
239 Full-length alignments were found for 674,342 of our reference sequences when aligned to the  
240 genome. We found 47,223 single-base differences in these aligned regions, far more SNPs than  
241 segregate within the colonies we assayed. This pattern is consistent with the known population  
242 history of laboratory gerbils: the Charles River colony, from which our animals originate, was  
243 rederived from a U.S. colony from which the DNA for the genome was supplied.

244 We used 28,885 autosomal SNPs to evaluate the diversity between the three colonies and  
245 found that while each colony does possess a small set of private alleles, most alleles are shared  
246 across all colonies (Table 1). A substantial portion of the variation (24%) is explained by  
247 differences between Edinburgh and the other colonies (Figure 2). Eigenvector 2 shows that much  
248 of the remaining variation (7%) segregates within the Bangor colony. No higher-order  
249 eigenvectors discriminate the colonies, instead they partition variation common to all.  $F_{st}$  metrics  
250 between the colonies suggest high overall similarity between Bangor and Sheffield ( $F_{st} = 0.069$ )  
251 while identifying Edinburgh as an outlier with  $F_{st}$  of 0.235 compared to Bangor and 0.352 to  
252 Sheffield. The structure analysis also suggests little overall differentiation between Bangor and

253 Sheffield, and finds that Edinburgh is slightly more divergent, though still very similar (Figure  
254 3). Overall, these data suggest that while Edinburgh animals have marked differences from other  
255 gerbils, they still share many genetic variants.

256 In general, the highest diversity is found in the Bangor animals. This is apparent in both  
257 the PCA (Figure 2) and the number of polymorphic sites segregating within the Bangor strain  
258 (Table 1) and may be due to the higher number of individuals screened. Edinburgh animals have  
259 far fewer segregating sites, lower nucleotide diversity, and lower heterozygosity overall, which  
260 may be a result of serial bottlenecks. The principle components analysis and the low number of  
261 private alleles suggests that the Sheffield animals contain a subset of the diversity found within  
262 the Bangor strain (Figure 2). As expected the F1 offspring between Edinburgh and Sheffield are  
263 found intermediate to the parents.

264 Nucleotide diversity in gerbils is quite high compared with other laboratory rodents  
265 (Table 2). In fact, genetic diversity in the gerbils often rivals the diversity found in wild-caught  
266 mice, and, contrary to previous claims (Neumann et al., 2001; Razzoli et al., 2003), far exceeds  
267 the diversity in inbred mice and rats (Ness et al., 2012; Salcedo, Gerald, & Nachman, 2007;  
268 Smits, van Zutphen, Plasterk, & Cuppen, 2004). It is clear that genetic diversity in Tumblebrook  
269 gerbils is much higher than previous reports suggest (Neumann et al., 2001; Razzoli et al., 2003).  
270 It is also clear that the breeding scheme alone does not robustly predict the amount of standing  
271 genetic diversity of an animal colony, especially in non-model rodents.

272

273

274

275

276

## DISCUSSION

277

278

279

280

281

282

283

284

285

286

287

We have demonstrated that appreciable genetic diversity segregates within Tumblebrook Farm strain Mongolian gerbils. Our findings are contrary to earlier reports suggesting that diversity may be as low as, or lower than inbred mouse colonies (Neumann et al., 2001; Razzoli et al., 2003). These reports evaluated a small portion of the genome and, perhaps unsurprisingly, found little variation. For instance, Neumann et al. (2001) evaluated diversity at nine microsatellites and found that lab strains had severely reduced allelic diversity compared to wild animals and Razzoli et al. (2003) found a similar pattern using 228 AFLP fragments from six primer combinations. Our genome-wide assay evaluated millions of bases and so has much higher power to find rare variants. Using these data we find that genetic diversity in Mongolian gerbils is relatively high amongst outbred rodent colonies ( $\pi = 0.0059$  in gerbils and  $\pi \leq 0.0010$  in other rodents, Table 2).

288

289

290

291

292

293

294

295

296

297

298

Lab-maintained rodent colonies are often small due to the costs and space needed for maintenance of many animals. With such small populations, genetic drift plays an important role in determining the standing level of variation. Drift can be expected to increase genetic differentiation between colonies through time, especially given the population bottleneck that often occurs when a colony is established or moved to a new location. Knowledge of levels of genetic diversity in an institutional colony is therefore vital for correct colony management – for example *Phodopus* hamsters have been referred to as outbred and maintained in large colonies (Brekke & Good, 2014). However, analysis of ddRAD data from two hamster species (J. Good, personal communication) shows that in fact genetic diversity is extremely low in both (Table 2), and so hamster colonies could be maintained with few individuals with no resulting loss of diversity. Despite the length of time in captivity, the Tumblebrook gerbils are (correctly)

299 maintained as a large outbred colony ( $\geq 100$  breeding pairs) by Charles River Ltd. Our data  
300 suggest that the diversity present in that original stock has been sub-sampled and exposed to drift  
301 in each of the three independent colonies we assayed. At one extreme is the Edinburgh colony  
302 which was not only the first isolated from Tumblebrook, but has been transferred through three  
303 universities and experienced the associated bottlenecks. Given this history, it is not surprising  
304 that the Edinburgh animals have the fewest SNPs segregating within them, nor that they are  
305 somewhat differentiated from Bangor and Sheffield. The Sheffield animals, which were  
306 established from Tumblebrook strain founders in 2014 and have been moved through only two  
307 universities, also show a reduced diversity, though still higher than Edinburgh. The Bangor  
308 colony was established most recently in 2016 and has the highest amount of diversity. As these  
309 animals were sent directly from Charles River Ltd, they likely represent a large portion of the  
310 variation contained in the Tumblebrook stock. Our data suggest that genetic drift in these three  
311 colonies is actively eroding the standing genetic variation and as they have been maintained in  
312 isolation from each other, it has resulted in noticeable differentiation between the colonies.

313         There are two major ramifications of the loss and partitioning of genetic variation in lab  
314 colonies. First, animals from the same original outbred stock may respond very differently to an  
315 experiment if they come from different isolated colonies. Many papers state that diversity in  
316 gerbils is quite low, one even suggesting that smaller error bars in laboratory individuals than  
317 wild-caught individuals are due to the lower genetic diversity (i.e.: Stuermer & Wetzel, 2006).  
318 While almost certainly correct that the diversity in their colony is low, our data suggest that is  
319 likely a reflection of high drift in an isolated colony, not low diversity in the original  
320 Tumblebrook stocks or even across all laboratory gerbils in general. That diversity is low is an  
321 important factor in interpreting many experimental results, but generally missing from this

322 acknowledgement is that while diversity is likely low in any specific colony, that does not mean  
323 that all colonies are genetically similar. This may partly explain why some experimental  
324 outcomes are not able to be replicated despite using animals from the same original outbred  
325 strain (Justice & Dhillon, 2016; Richter et al., 2011). This general argument is applicable not  
326 only to rodent colonies, but any laboratory animals of any taxa where the population size is  
327 limited.

328         The second important ramification of high genetic drift in laboratory colonies is that  
329 while diversity will be lost in any single colony through time, across multiple isolated colonies  
330 much of the original diversity may be preserved. This is not a new idea and there are major  
331 ongoing efforts using multiple inbred strains to capture the range of natural diversity (Churchill  
332 et al., 2004; Collaborative Cross Consortium, 2012; Threadgill & Churchill, 2012). By  
333 intercrossing between multiple differentiated colonies, researchers can do controlled experiments  
334 designed to uncover the genetic architecture of complex traits (Festing, 2010). In this regard  
335 gerbils seem to be ideal candidates. Indeed, the high overall variation, number of private alleles  
336 within colonies, and intermediate location of the Sheffield x Edinburgh F1 offspring in the PCA  
337 (Figure 2) all suggest that sufficient diversity exists between the colonies for successful genetic  
338 experiments.

### 339 Conclusions

340 Despite being derived from a relatively small number of founders and experiencing repeated  
341 bottlenecks over the past 80 years in captivity, the Tumblebrook Farm strain of Mongolian  
342 gerbils does not possess low levels of genetic diversity. Genetic drift in small institutional  
343 colonies of this species can increase differentiation, and may impact on the reproducibility of  
344 results. We advise that experimenters consider the history of their colony when planning and

345 performing research projects using gerbils. We further suggest that published claims on levels of  
346 genetic diversity in laboratory rodents based on small numbers of genetic markers should be  
347 taken with a pinch of salt.

348

349

350

351

352

353

354

355

356

357

358

359

360

361

362

363

364

365

366

367



368  
369  
370  
371  
372  
373  
374  
375  
376  
377  
378  
379  
380  
381  
382  
383  
384  
385  
386  
387  
388  
389  
390

## ACKNOWLEDGEMENTS

We would like to thank Leila Abbas for providing us with the Edinburgh and Sheffield strains of gerbils and Charlie Parady (Charles River Ltd) and Judith Allen for information on the maintenance of the Charles River and Edinburg gerbil colonies respectively. We thank Matt Hegarty (Aberystwyth University) for advice on GBS sequencing and Rhys Morgan and Emlyn Roberts for technical assistance with animal husbandry. Finally, we would like to thank Jeff Good, Jesse Weber, and Kyle Turner for helping us with diversity estimates from various rodent colonies. This work was funded by a Leverhulme Trust research project grant to J.F.M. and K.A.S. (RPG-2015-450).

391  
392  
393  
394  
395  
396  
397  
398  
399  
400  
401  
402  
403  
404  
405  
406  
407  
408  
409  
410  
411  
412  
413

## REFERENCES

- Abbas, L., & Rivolta, M. N. (2015). Aminoglycoside ototoxicity and hair cell ablation in the adult gerbil: A simple model to study hair cell loss and regeneration. *Hearing Research*, 325(C), 12–26. <http://doi.org/10.1016/j.heares.2015.03.002>
- Brekke, T. D., & Good, J. M. (2014). Parent-of-origin growth effects and the evolution of hybrid inviability in dwarf hamsters. *Evolution*, 68(11), 3134–3148. <http://doi.org/10.1111/evo.12500>
- Brekke, T. D., Henry, L. A., & Good, J. M. (2016). Genomic imprinting, disrupted placental expression, and speciation. *Evolution*, 70(12), 2690–2703. <http://doi.org/10.1111/evo.13085>
- Buchhalter, J. R. (1993). Animal models of inherited epilepsy. *Epilepsia*, 34(Suppl. 3), S31–S41.
- Buckmaster, P. S. (2006). Inherited Epilepsy in Mongolian Gerbils. In A. Pitkänen, P. A. Schwartzkroin, & S. L. Moshé (Eds.), *Models of Seizures and Epilepsy* (pp. 273–294). Burlington: Academic Press.
- Casellas, J. (2011). Inbred mouse strains and genetic stability: a review. *Animal*, 5(1), 1–7. <http://doi.org/10.1017/S1751731110001667>
- Catchen, J. M., Amores, A., Hohenlohe, P., Cresko, W., & Postlethwait, J. H. (2011). Stacks: building and Genotyping Loci De Novo From Short-Read Sequences. *G3: Genes/ Genomes/ Genetics*, 1(3), 171–182. <http://doi.org/10.1534/g3.111.000240>
- Catchen, J., Hohenlohe, P. A., Bassham, S., Amores, A., & Cresko, W. A. (2013). Stacks: an analysis tool set for population genomics. *Molecular Ecology*, 22(11), 3124–3140.
- Chen, W., Jongkamonwiwat, N., Abbas, L., Eshtan, S. J., Johnson, S. L., Kuhn, S., et al. (2012). Restoration of auditory evoked responses by human ES-cell-derived otic progenitors. *Nature*, 490(7419), 278–282. <http://doi.org/10.1038/nature11415>

- 414 Chia, R., Achilli, F., Festing, M. F. W., & Fisher, E. M. C. (2005). The origins and uses of  
415 mouse outbred stocks. *Nature Genetics*, *37*(11), 1181–1186. <http://doi.org/10.1038/ng1665>
- 416 Churchill, G. A., Airey, D. C., Allayee, H., Angel, J. M., Attie, A. D., Beatty, J., et al. (2004).  
417 The Collaborative Cross, a community resource for the genetic analysis of complex traits.  
418 *Nature Genetics*, *36*(11), 1133–1137. <http://doi.org/10.1038/ng1104-1133>
- 419 Clark, M. M., Ham, M., & Galef, B. G. (1994). Differences in the sex ratios of offspring  
420 originating in the right and left ovaries of Mongolian gerbils (*Meriones unguiculatus*).  
421 *Journal of Reproduction and Fertility*, *101*(2), 393–396. [http://doi.org/10.1016/B978-](http://doi.org/10.1016/B978-012263951-7/50010-7)  
422 [012263951-7/50010-7](http://doi.org/10.1016/B978-012263951-7/50010-7)
- 423 Collaborative Cross Consortium. (2012). The genome architecture of the Collaborative Cross  
424 mouse genetic reference population. *Genetics*, *190*, 389–401.
- 425 de Koning, D.-J., & McIntyre, L. M. (2017). Back to the Future: Multiparent Populations  
426 Provide the Key to Unlocking the Genetic Basis of Complex Traits. *Genetics*, *206*(2), 527–  
427 529. <http://doi.org/10.1534/genetics.117.203265>
- 428 Du, X. Y., Li, W., Sa, X. Y., Li, C. L., Lu, J., Wang, Y. Z., & Chen, Z. W. (2015). Selection of  
429 an effective microsatellite marker system for genetic control and analysis of gerbil  
430 populations in China. *Genetics and Molecular Research*, *14*(3), 11030–11042.  
431 <http://doi.org/10.4238/2015.September.21.16>
- 432 Du, X., Chen, Z., Li, W., Tan, Y., Lu, J., Zhu, X., et al. (2010). Development of Novel  
433 Microsatellite DNA Markers by Cross-Amplification and Analysis of Genetic Variation in  
434 Gerbils. *Journal of Heredity*, *101*(6), 710–716. <http://doi.org/10.1093/jhered/esq066>
- 435 Elshire, R. J., Glaubitz, J. C., Sun, Q., Poland, J. A., Kawamoto, K., Buckler, E. S., & Mitchell,  
436 S. E. (2011). A robust, simple genotyping-by-sequencing (GBS) approach for high diversity

- 437 species. *Plos One*, 6(5), e19379–e19379. <http://doi.org/10.1371/journal.pone.0019379>
- 438 Eppig, J. T. (2007). Mouse strain and genetic nomenclature: an abbreviated guide. In J. G. Fox,  
439 M. T. Davisson, F. W. Quimby, S. W. Barthold, C. E. Newcomer, & A. L. Smith (Eds.), *The*  
440 *Mouse in Biomedical Research* (2nd ed., Vol. 1, pp. 79–98). London: the mouse in  
441 biomedical research.
- 442 Falush, D., Stephens, M., & Pritchard, J. K. (2003). Inference of population structure using  
443 multilocus genotype data: linked loci and correlated allele frequencies. *Genetics*, 164(4),  
444 1567–1587.
- 445 Falush, D., Stephens, M., & Pritchard, J. K. (2007). Inference of population structure using  
446 multilocus genotype data: dominant markers and null alleles. *Molecular Ecology Notes*, 7(4),  
447 574–578. <http://doi.org/10.1111/j.1471-8286.2007.01758.x>
- 448 Festing, M. F. (1999). Warning: the use of heterogeneous mice may seriously damage your  
449 research. *Neurobiology of Aging*, 20(2), 237–44– discussion 245–6.
- 450 Festing, M. F. W. (2010). Inbred Strains Should Replace Outbred Stocks in Toxicology, Safety  
451 Testing, and Drug Development. *Toxicologic Pathology*, 38(5), 681–690.  
452 <http://doi.org/10.1177/0192623310373776>
- 453 Fuchsberger, C., Flannick, J., Teslovich, T. M., Mahajan, A., Agarwala, V., Gaulton, K. J., et al.  
454 (2016). The genetic architecture of type 2 diabetes. *Nature*, 536(7614), 1–29.  
455 <http://doi.org/10.1038/nature18642>
- 456 Gawriluk, T. R., Simkin, J., Thompson, K. L., Biswas, S. K., Clare-Salzler, Z., Kimani, J. M., et  
457 al. (2016). Comparative analysis of ear-hole closure identifies epimorphic regeneration as a  
458 discrete trait in mammals. *Nature Communications*, 7, 1–16.  
459 <http://doi.org/10.1038/ncomms11164>

- 460 Groen, A., & Lagerwerf, A. J. (1979). Genic heterogeneity and genetic monitoring of mouse  
461 outbred stocks. *Laboratory Animals*, 13(2), 81–85.
- 462 Harper, J. M. (2008). Wild-derived mouse stocks: an underappreciated tool for aging research.  
463 *Age*, 30(2-3), 135–145. <http://doi.org/10.1007/s11357-008-9057-0>
- 464 Justice, M. J., & Dhillon, P. (2016). Using the mouse to model human disease: increasing  
465 validity and reproducibility. *Disease Models & Mechanisms*, 9(2), 101–103.  
466 <http://doi.org/10.1242/dmm.024547>
- 467 Li, H., & Durbin, R. (2009). Fast and accurate short read alignment with Burrows-Wheeler  
468 transform. *Bioinformatics*, 25(14), 1754–1760.
- 469 Li, H., Handsaker, B., Wysoker, A., Fennell, T., Ruan, J., Homer, N., et al. (2009). The Sequence  
470 Alignment/Map format and SAMtools. *Bioinformatics*, 25(16), 2078–2079.
- 471 Li, X., Lu, J., Wang, Y., Huo, X., Li, Z., Zhang, S., et al. (2016). Establishment and  
472 Characterization of a Newly Established Diabetic Gerbil Line. *Plos One*, 11(7), e0159420–  
473 13. <http://doi.org/10.1371/journal.pone.0159420>
- 474 McManus, J. J. (1972). Water relations and food consumption of the mongolian gerbil, *Meriones*  
475 *unguiculatus*. *Comparative Biochemistry and Physiology Part a: Physiology*, 43(4), 959–  
476 967. [http://doi.org/10.1016/0300-9629\(72\)90168-5](http://doi.org/10.1016/0300-9629(72)90168-5)
- 477 Meisler, M. H., Kearney, J., Ottman, R., & Escayg, A. (2001). Identification of Epilepsy Genes  
478 in Human and Mouse. *Annual Review of Genetics*, 35(1), 567–588.  
479 <http://doi.org/10.1146/annurev.genet.35.102401.091142>
- 480 Ness, R. W., Zhang, Y.-H., Cong, L., Wang, Y., Zhang, J.-X., & Keightley, P. D. (2012).  
481 Nuclear Gene Variation in Wild Brown Rats. *G3: Genes/ Genomes/ Genetics*, 2(12), 1661–  
482 1664.

- 483 Neumann, K., Maak, S., & Stuermer, I. W. (2001). Low microsatellite variation in laboratory  
484 gerbils. *Journal of Heredity*, 327–347. <http://doi.org/10.1002/9781444318777.ch23>
- 485 Papaioannou, V. E., & Festing, M. F. (1980). Genetic drift in a stock of laboratory mice.  
486 *Laboratory Animals*, 14(1), 11–13. <http://doi.org/10.1258/002367780780943015>
- 487 Petrij, F., van Veen, K., Mettler, M., & Brückmann, V. (2001). A second acromelanistic  
488 allelomorph at the albino locus of the Mongolian gerbil (*Meriones unguiculatus*). *Journal of*  
489 *Heredity*, 92(1), 74–78.
- 490 Pritchard, J. K., Stephens, M., & Donnelly, P. (2000). Inference of population structure using  
491 multilocus genotype data. *Genetics*, 155(2), 945–959.
- 492 Razzoli, M., Papa, R., Valsecchi, P., & Nonnis Marzano, F. (2003). AFLP to Assess Genetic  
493 Variation in Laboratory Gerbils (*Meriones unguiculatus*). *Journal of Heredity*, 94(6), 507–  
494 511.
- 495 Rich, S. S. (2016). Diabetes: Still a geneticist's nightmare. *Nature*, 536(7614), 37–38.  
496 <http://doi.org/10.1038/nature18906>
- 497 Richter, S. H., Garner, J. P., Zipser, B., Lewejohann, L., Sachser, N., Touma, C., et al. (2011).  
498 Effect of Population Heterogenization on the Reproducibility of Mouse Behavior: A Multi-  
499 Laboratory Study. *Plos One*, 6(1), e16461–14. <http://doi.org/10.1371/journal.pone.0016461>
- 500 Rosenberg, N. A. (2003). distruct: a program for the graphical display of population structure.  
501 *Molecular Ecology Notes*, 4(1), 137–138. <http://doi.org/10.1046/j.1471-8286.2003.00566.x>
- 502 Rosenberg, N. A., Pritchard, J. K., Weber, J. L., Cann, H. M., Kidd, K. K., Zhivotovsky, L. A., &  
503 Feldman, M. W. (2002). Genetic Structure of Human Populations. *Science (New York, N.Y.)*,  
504 298(5602), 2381–2385. [http://doi.org/10.2307/3833180?ref=search-](http://doi.org/10.2307/3833180?ref=search-gateway:7b5294a290ca39cb8bef6104439e20fb)  
505 [gateway:7b5294a290ca39cb8bef6104439e20fb](http://doi.org/10.2307/3833180?ref=search-gateway:7b5294a290ca39cb8bef6104439e20fb)

- 506 Russell, W. M. S., & Burch, R. L. (1959). *The Principles of Humane Experimental Technique*.  
507 London: Methuen & Co. Ltd.
- 508 Salcedo, T., Geraldès, A., & Nachman, M. W. (2007). Nucleotide Variation in Wild and Inbred  
509 Mice. *Genetics*, *177*(4), 2277–2291.
- 510 Smits, B. M. G., van Zutphen, B. F. M., Plasterk, R. H. A., & Cuppen, E. (2004). Genetic  
511 variation in coding regions between and within commonly used inbred rat strains. *Genome*  
512 *Research*, *14*(7), 1285–1290.
- 513 Srivastava, A., Morgan, A. P., Najarian, M. L., Sarsani, V. K., Sigmon, J. S., Shorter, J. R., et al.  
514 (2017). Genomes of the Mouse Collaborative Cross. *Genetics*, *206*(2), 537–556.  
515 <http://doi.org/10.1534/genetics.116.198838>
- 516 Stuermer, I. W., & Wetzel, W. (2006). Early experience and domestication affect auditory  
517 discrimination learning, open field behaviour and brain size in wild Mongolian gerbils and  
518 domesticated Laboratory gerbils (*Meriones unguiculatus forma domestica*). *Behavioural*  
519 *Brain Research*, *173*(1), 11–21.
- 520 Stuermer, I. W., Plotz, K., Leybold, A., Zinke, O., Kalberlah, O., Samjaa, R., & Scheich, H.  
521 (2003). Intraspecific Allometric comparison of Laboratory gerbils with Mongolian Gerbils  
522 Trapped in the Wild Indicates Domestication in *Meriones unguiculatus* (Milne-Edwards,  
523 1867) (Rodentia: Gerbillinae). *Zoologischer Anzeiger - a Journal of Comparative Zoology*,  
524 *242*(3), 249–266. <http://doi.org/10.1078/0044-5231-00102>
- 525 Svenson, K. L., Gatti, D. M., Valdar, W., & Welsh, C. E. (2012). High-resolution genetic  
526 mapping using the Mouse Diversity outbred population. *Journal of Heredity*.  
527 <http://doi.org/10.1534/genetics.111.132597/-/DC1>
- 528 Thiessen, D. D., & Kittrell, E. M. (1980). The Harderian gland and thermoregulation in the

529 gerbil (*Meriones unguiculatus*). *Physiology & Behavior*, 24(3), 417–424.  
530 [http://doi.org/10.1016/0031-9384\(80\)90229-2](http://doi.org/10.1016/0031-9384(80)90229-2)

531 Threadgill, D. W., & Churchill, G. A. (2012). Ten years of the collaborative cross. *Genetics*.  
532 <http://doi.org/10.1534/genetics.111.138032/-/DC1/FileS1.pdf>

533 Vincent, A. L., & Rodrick, G. E. (1979). The pathology of the Mongolian Gerbil (*Meriones*  
534 *unguiculatus*): a review. *Laboratory Animal Science*, 29(5), 645–651.

535 Wang, D., Wang, Y., & Wang, Z. (2000). Metabolism and thermoregulation in the Mongolian  
536 gerbil *Meriones unguiculatus*. *Acta Theriologica*, 45(2), 183–192.  
537 <http://doi.org/10.4098/AT.arch.00-21>

538 Weber, J. N., Peterson, B. K., & Hoekstra, H. E. (2013). Discrete genetic modules are  
539 responsible for complex burrow evolution in *Peromyscus* mice. *Nature*, 493(7432), 402–405.  
540 <http://doi.org/10.1038/nature11816>

541 Zheng, X., Levine, D., Shen, J., & Gogarten, S. M. (2012). A high-performance computing  
542 toolset for relatedness and principal component analysis of SNP data. *Journal of Heredity*,  
543 28(24), 3326–3328.

544  
545  
546  
547  
548  
549  
550  
551



552

## FIGURES AND TABLES

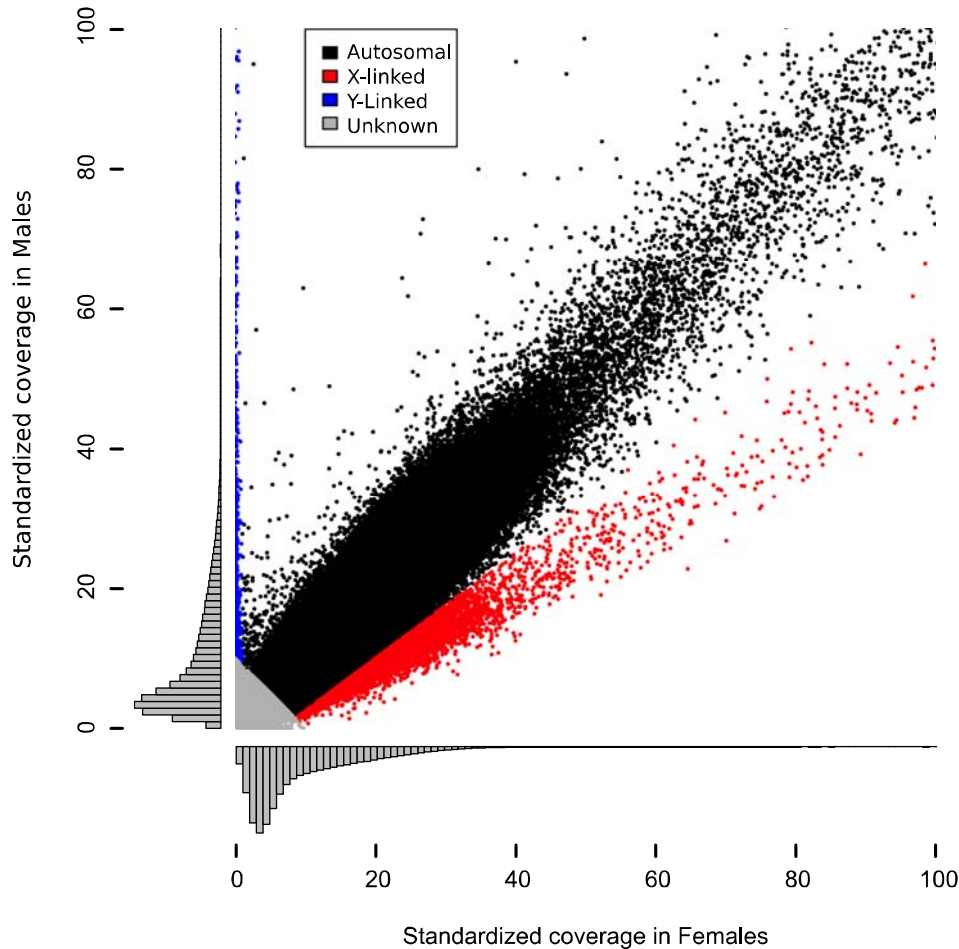

553

554 Figure 1. Relative coverage in females and males can be used to identify sex chromosomes.  
555 Plotted here is standardized coverage in females against standardized coverage in males,  
556 histograms show the density of markers along each axis. The markers shown are those with low  
557 overall coverage; a long tail exists in both females and males and is not shown here. markers  
558 with less than 10x total standardized coverage were annotated as unknown (grey) because those  
559 have too little coverage to reliably distinguish X- and Y-linkage from autosomes. Of the  
560 remaining tags, those with less than 1x standardized coverage in females are annotated as Y-  
561 linked (blue). Those which satisfy the inequality:  $\text{Coverage}^{\text{male}} < \frac{3}{4} \text{Coverage}^{\text{female}} - 5$  were  
562 identified as X-linked (red). This line has a slope designed to discriminate points in the X-linked  
563 cluster (slope =  $\frac{1}{2}$ ) from those in the autosomal cluster (slope = 1) while remaining fairly  
564 conservative near the origin. All remaining tags were annotated as autosomal (black).

565 Table 1. Diversity metrics in gerbils across the genome.

566

| Colony             | N  | Autosomal |         |        |        |       | X linked |         |       |        |       | Y linked |         |       |        |       |
|--------------------|----|-----------|---------|--------|--------|-------|----------|---------|-------|--------|-------|----------|---------|-------|--------|-------|
|                    |    | Bases     | Private | Poly.  | $\pi$  | Het.  | Bases    | Private | Poly. | $\pi$  | Het.  | Bases    | Private | Poly. | $\pi$  | Het.  |
| Bangor             | 12 | 2,131,103 | 5,702   | 24,516 | 0.0054 | 0.459 | 53,540   | 134     | 822   | 0.0039 | 0.619 | 32,014   | 32      | 489   | 0.0067 | 0.809 |
| Sheffield          | 5  | 1,485,832 | 592     | 11,409 | 0.0049 | 0.421 | 45,414   | 26      | 547   | 0.0060 | 0.630 | 20,850   | 12      | 265   | 0.0086 | 0.772 |
| Edinburgh          | 5  | 1,688,545 | 1,336   | 8,422  | 0.0032 | 0.313 | 50,487   | 40      | 564   | 0.0046 | 0.558 | 18,560   | 20      | 253   | 0.0100 | 0.846 |
| All colonies & F1s | 24 | 2,150,776 | n/a     | 28,885 | 0.0059 | 0.447 | 54,464   | n/a     | 929   | 0.0036 | 0.606 | 32,752   | n/a     | 551   | 0.0093 | 0.806 |

567

568 N: Number of individuals evaluated.

569 Bases: Number of bases with sufficient coverage to evaluate nucleotide diversity.

570 Private: Number of sites with private alleles.

571 Poly.: Number of sites that are polymorphic.

572  $\pi$ : Nucleotide diversity in each colony.

573 Het.: Average heterozygosity at the polymorphic sites.

574

575

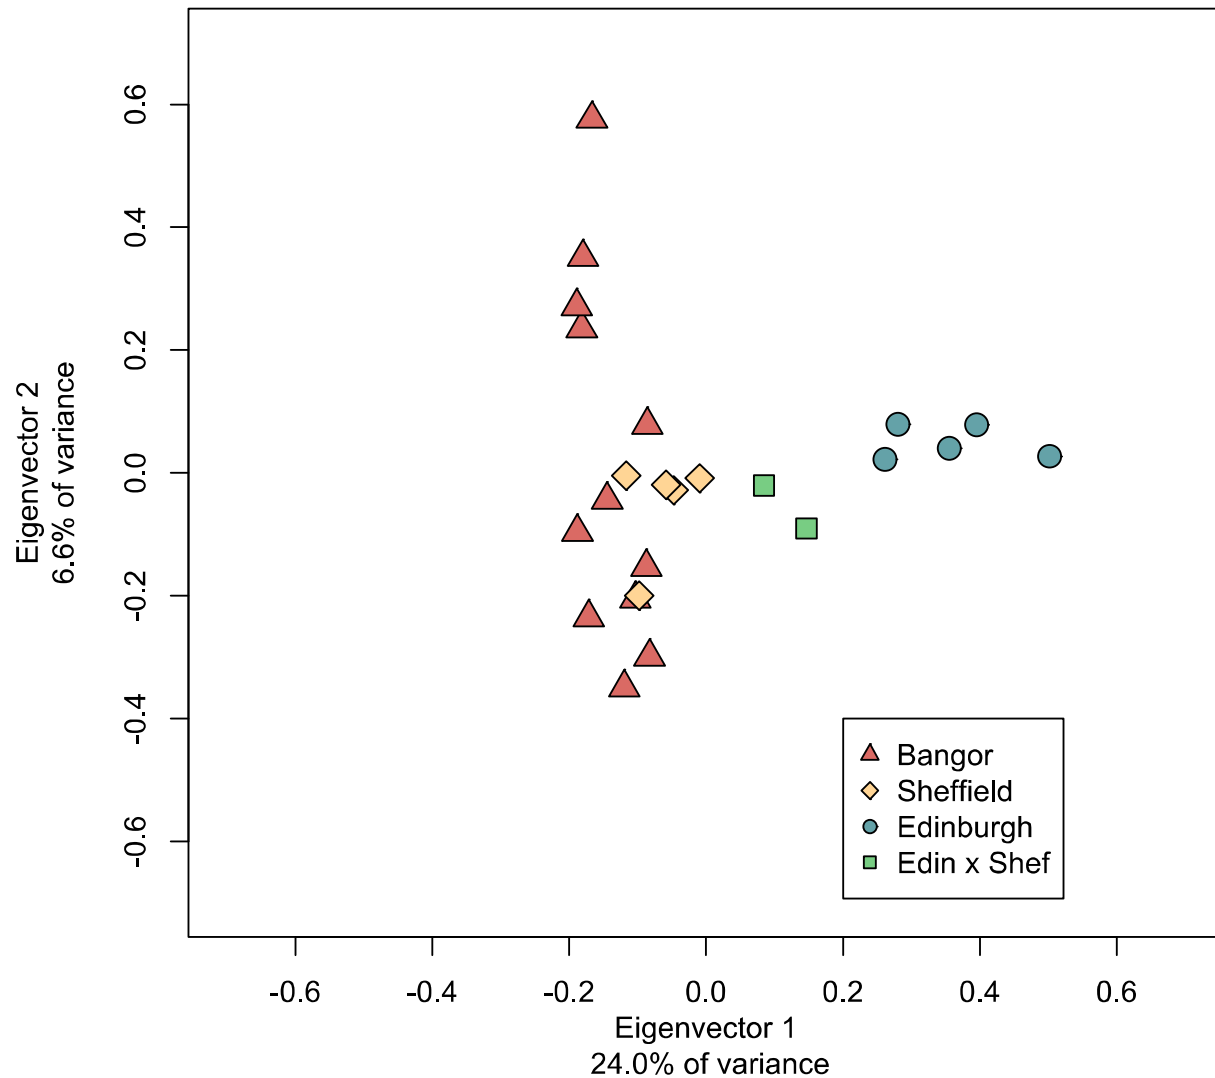

576

577

578 Figure 2. PCA of 28,885 autosomal SNPs. Eigenvector 1 explains the majority of the diversity in

579 these samples and strongly differentiates the Edinburgh colony from the others. Sheffield

580 contains a subset of the genetic diversity found within Bangor colony. F1 offspring between

581 Edinburgh female and a Sheffield male fall out intermediate.

582

583

584

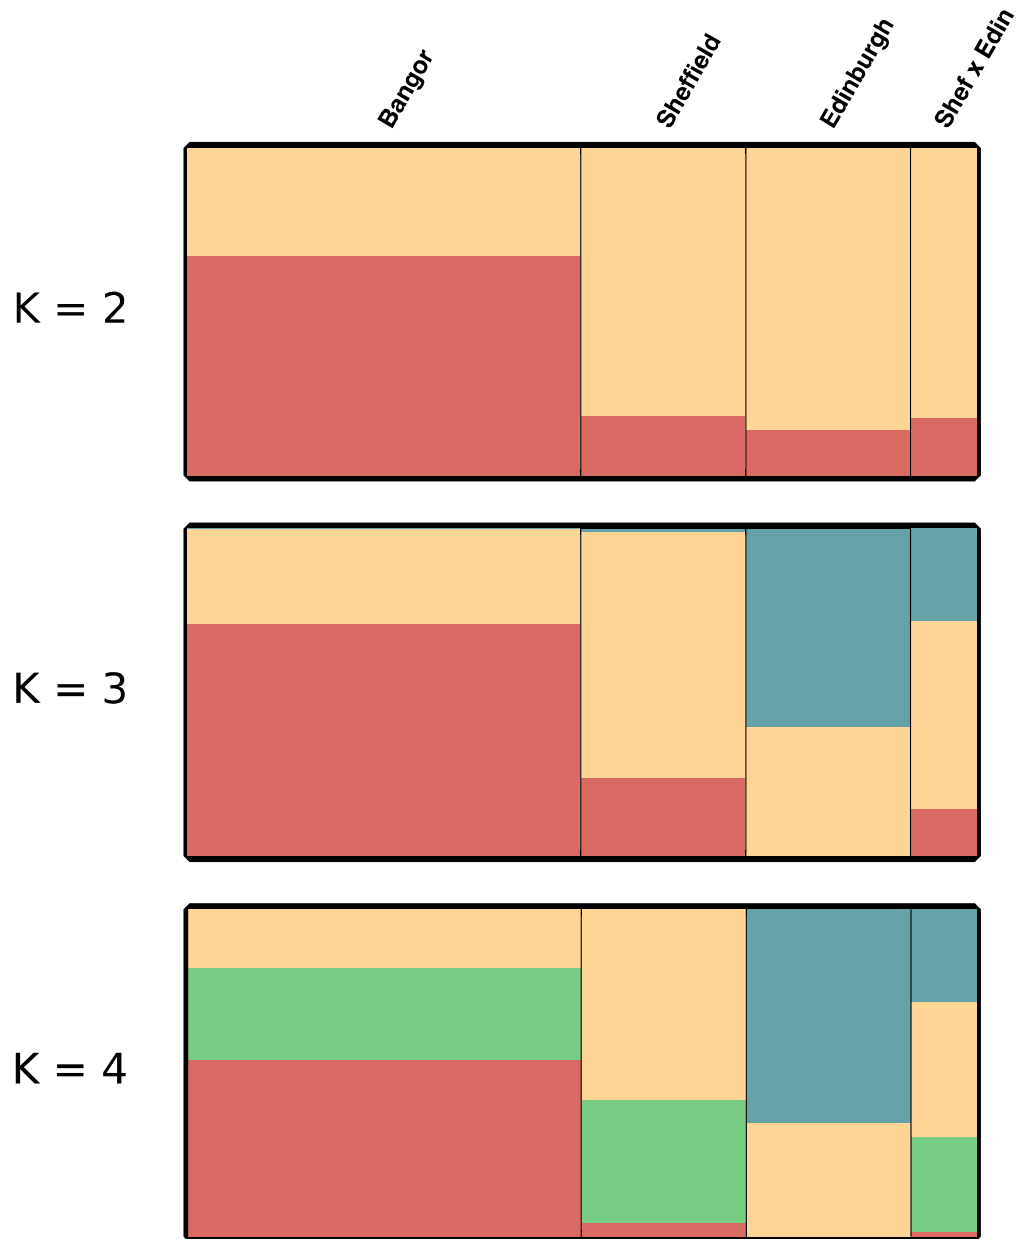

585

586 Figure 3. Structure plots of gerbil colonies. Structure was run for 20,000 iterations with 10,000

587 iterations of burn-in for K=2, 3, and 4. In general, the different colonies have similar assignment

588 especially at low K values. Edinburgh animals fall out uniquely at higher K values (i.e.: blue).

589 The F1 hybrids have mixed ancestry as expected for the offspring of a Sheffield x Edinburgh

590 cross.

591

592 Table 2. Nucleotide diversity in various rodent colonies.

| Species                                    | $\pi$  | Number of individuals | Breeding scheme     | Region of genome for which $\pi$ was evaluated | Approximate number of bases surveyed | Citation                        |
|--------------------------------------------|--------|-----------------------|---------------------|------------------------------------------------|--------------------------------------|---------------------------------|
| <i>Meriones unguiculatus</i>               | 0.0059 | 24                    | Outbred             | Near autosomal restriction sites (GBS)         | 2,200,000                            | This paper                      |
| <i>Mus musculus ssp.</i> <sup>a</sup>      | 0.0289 | 69                    | Collaborative cross | Whole genome sequencing                        | 2,300,000,000                        | (Srivastava et al., 2017)       |
| <i>Peromyscus maniculatus</i> <sup>b</sup> | 0.0006 | 13                    | Outbred             | Near restriction sites (ddRAD)                 | 400,000                              | (Weber et al., 2013)            |
| <i>Peromyscus polionotus</i> <sup>b</sup>  | 0.0010 | 1                     | Outbred             | Near restriction sites (ddRAD)                 | 400,000                              | (Weber et al., 2013)            |
| <i>Phodopus campbelli</i> <sup>c</sup>     | 0.0006 | 14                    | Outbred             | Near restriction sites (ddRAD)                 | 1,300,000                            | J. Good, personal communication |
| <i>Phodopus sungorus</i> <sup>c</sup>      | 0.0002 | 11                    | Outbred             | Near restriction sites (ddRAD)                 | 1,400,000                            | J. Good, personal communication |

593

594

595 <sup>a</sup> Based on mean value of 69 collaborative cross individuals. Data from the column titled “% het (autosomes) in sequenced sample” in  
 596 Supplemental Table 2 of (Srivastava et al., 2017). Approximate number of bases surveyed is based on a genome size of 2.7 Gigabases  
 597 divided by the mean “% coverage at 15x”.

598 <sup>b</sup> The *Peromyscus* animals evaluated here are the BW and PO strains originating with the *Peromyscus* stock center, bred at Harvard  
 599 University in the Hoekstra lab, and sequenced by (Weber et al., 2013).

600 <sup>c</sup> The *Phodopus* animals evaluated here are from the Good Lab at the University of Montana described in (Brekke & Good, 2014).
